# Supplementary material for: Defining Wildfire Susceptibility Maps in Italy for Understanding Seasonal Wildfire Regimes at the National Level
Source: MDPI journal article supplement (doi:10.3390/fire5010030), 2022-02-21
Supplement: s1 [file s1]

# Supplementary Materials: Defining Wildfire Susceptibility Maps in Italy for Understanding Seasonal Wildfire Regimes at National Level

Andrea Trucchia<sup>1\*</sup>, Giorgio Meschi<sup>1</sup>, Paolo Fiorucci<sup>1</sup>, Andrea Gollini<sup>2</sup>, Dario Negro<sup>2</sup>

## 1. Corine 2018 Land Cover legend and distribution

**Table S1.** CLC Codes and their description. The class evidenced by the (\*) symbol have not been used as input data of the machine learning model. For technical purposes, they have been merged into an *ad hoc* class "0".

| CLC_CODE | Label                                                                    |
|----------|--------------------------------------------------------------------------|
| 111      | Continuous urban fabric (*)                                              |
| 112      | Discontinuous urban fabric (*)                                           |
| 121      | Industrial or commercial units (*)                                       |
| 122      | Road and rail networks and associated land (*)                           |
| 123      | Port areas (*)                                                           |
| 124      | Airports (*)                                                             |
| 131      | Mineral extraction sites (*)                                             |
| 132      | Dump sites (*)                                                           |
| 133      | Construction sites (*)                                                   |
| 141      | Green urban areas (*)                                                    |
| 142      | Sport and leisure facilities (*)                                         |
| 211      | Non-irrigated arable land                                                |
| 212      | Permanently irrigated land                                               |
| 213      | Rice fields                                                              |
| 221      | Vineyards                                                                |
| 222      | Fruit trees and berry plantations                                        |
| 223      | Olive groves                                                             |
| 224      | Other Permanent crops                                                    |
| 231      | Pastures                                                                 |
| 241      | Annual crops associated with permanent crops                             |
| 242      | Complex cultivation patterns                                             |
| 243      | Land principally occupied by agric., with significant areas of nat. veg. |
| 244      | Agro-forestry areas                                                      |
| 311      | Broad-leaved forest                                                      |
| 312      | Coniferous forest                                                        |
| 313      | Mixed forest                                                             |
| 321      | Natural grasslands                                                       |
| 322      | Moors and heathland                                                      |
| 323      | Sclerophyllous vegetation                                                |
| 324      | Transitional woodland-shrub                                              |
| 331      | Beaches, dunes, sands                                                    |
| 332      | Bare rocks                                                               |
| 333      | Sparsely vegetated areas                                                 |
| 334      | Burnt areas                                                              |
| 335      | Glaciers and perpetual snow                                              |
| 411      | Inland marshes (*)                                                       |
| 412      | Peat bogs (*)                                                            |
| 421      | Salt marshes (*)                                                         |
| 422      | Salines (*)                                                              |
| 423      | Intertidal flats (*)                                                     |
| 511      | Water courses (*)                                                        |
| 512      | Water bodies (*)                                                         |
| 521      | Coastal lagoons (*)                                                      |
| 522      | Estuaries (*)                                                            |
| 523      | Sea and ocean (*)                                                        |

## 2. Importance ranking of the neighboring vegetation variable

In the following, the importance ranking assessed by the ML algorithm (through the Gini Impurity method) is shown, for several groups of variables:

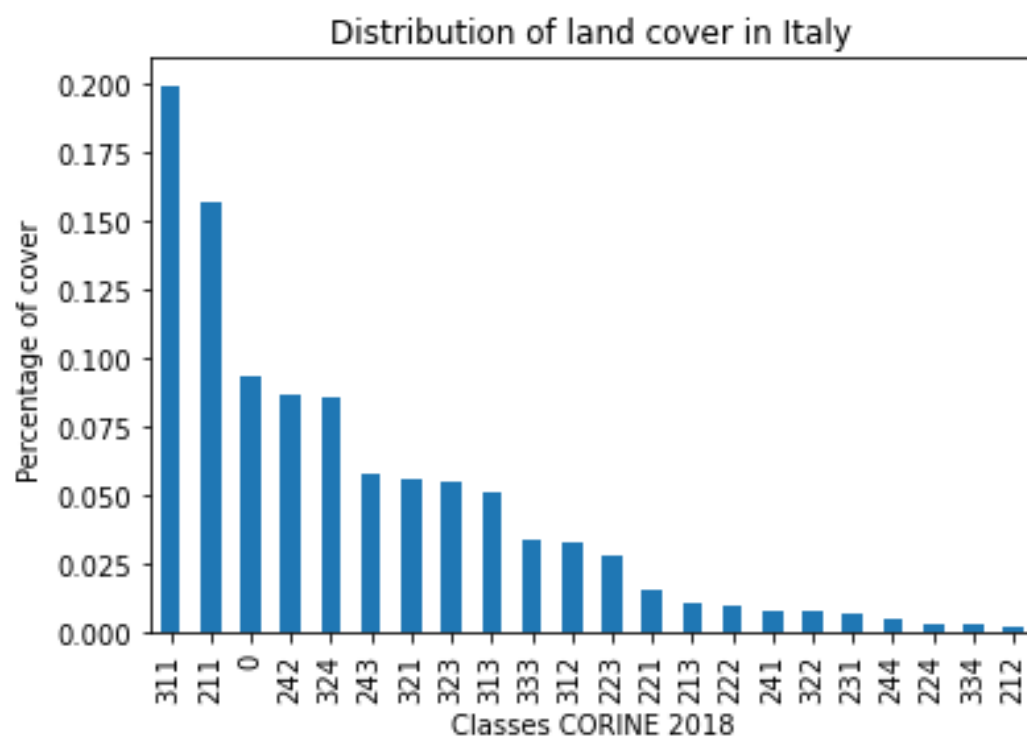

**Figure S1.** Distribution of the CORINE 2018 land cover classes in Italy, the class 0 refers to an aggregation of not burnable areas as specified in [S1](#)

- The variables that have been merged in the main Manuscript in the variable "neighbouring vegetation", are here represented in detail, in order to assess the importance of vegetation continuity for each vegetation/land use class of CLC18. This has been shown of course for both Summer and Winter wildfire seasons, in Figures [S2](#), [S3](#)
- The variables that have been merged in the main Manuscript in the variable "vegetation", corresponding to the vegetation of the analysed pixel are here represented in detail, in order to assess the impact of vegetation types for each vegetation/land use class of CLC18. Also this has been shown for both Summer and Winter wildfire seasons, see Figures [S4](#), [S5](#)

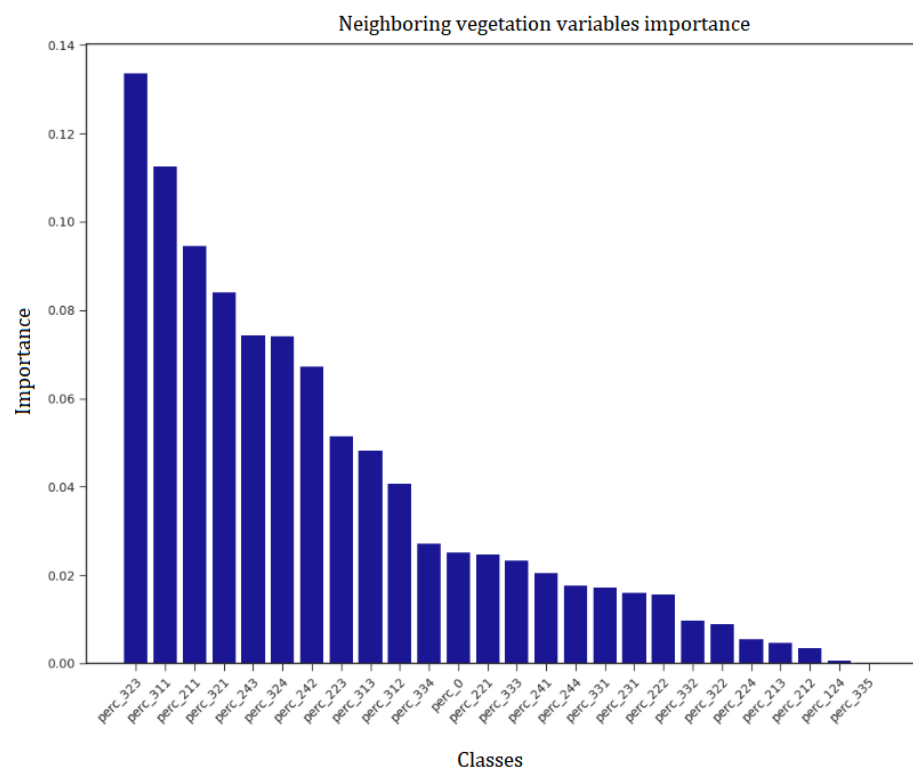

**Figure S2.** Importance ranking (Mean Decrease in Impurity) of the neighboring vegetation variable related to the summer's seasonal analysis

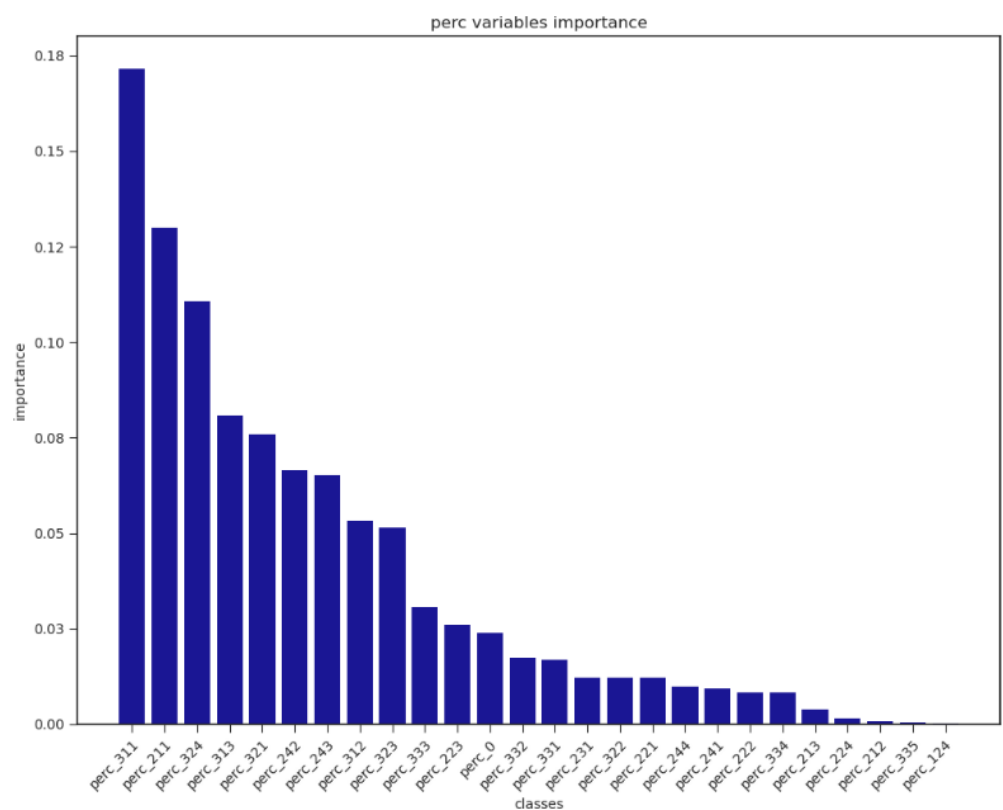

**Figure S3.** Importance ranking (Mean Decrease in Impurity) of the neighboring vegetation variable related to the winter's seasonal analysis

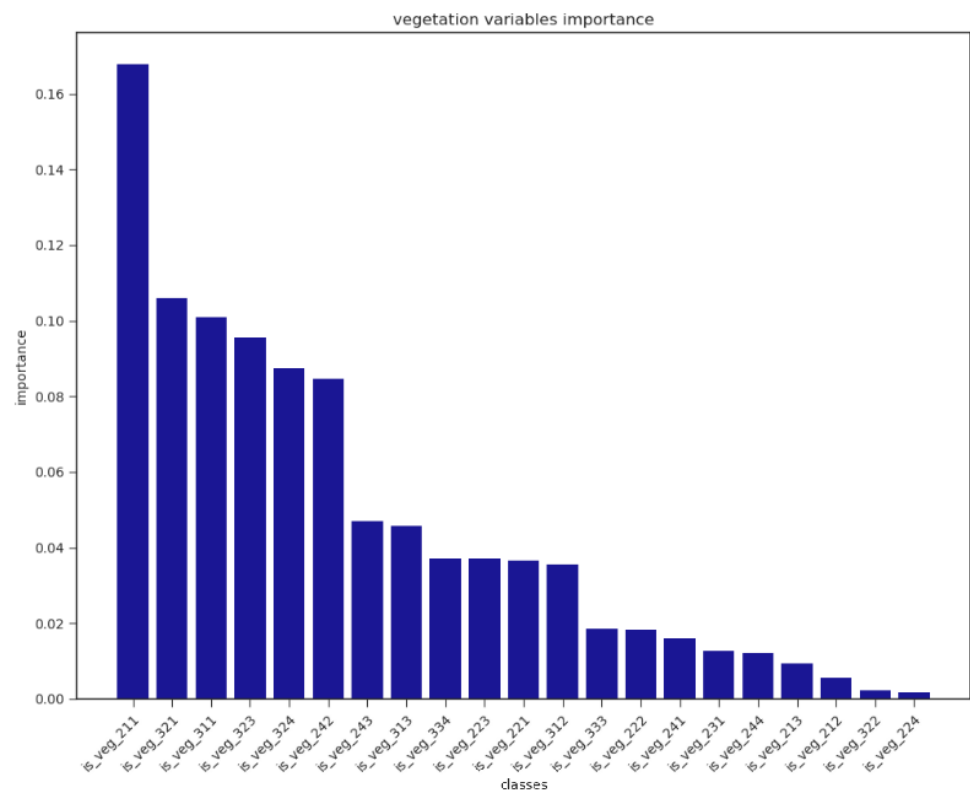

**Figure S4.** Importance ranking (Mean Decrease in Impurity) of the vegetation variable related to the summer’s seasonal analysis

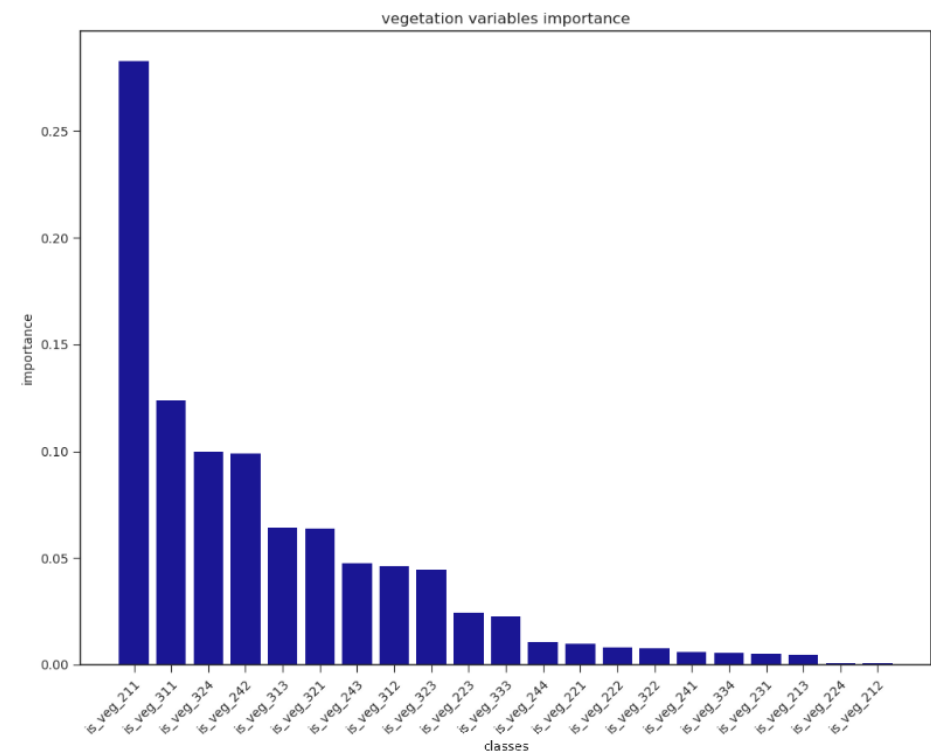

**Figure S5.** Importance ranking (Mean Decrease in Impurity) of the neighboring vegetation variable related to the winter’s seasonal analysis

### 3. Importance ranking of the neighboring vegetation variable

In the following, the four most important vegetation classes in the ranking of the previous Section are examined in detail, for both summer (CLC codes 211, 321, 311, 323) and winter (CLC codes 211, 311, 324, 242). Every pixel of the susceptibility map corresponding to the latter CLC codes have been retrieved and their susceptibility distribution has been plotted.

This highlighted different behaviours of those important classes: some classes are important to the ML algorithm because they are immediately associated with low susceptibility, such as arable land (211) and rice fields (242), while others are important because they are strongly associated with high susceptibility output (such as Sclerophyllous vegetation, 323). Other classes exhibit more complex behaviour, such as broad-leaves (311) and natural grassland (321). In this case, the interactions with other predisposing factors, such as DEM, slope and climate, is needed by the ML algorithm in order to assign a susceptibility value to the pixels characterized by such vegetation types.

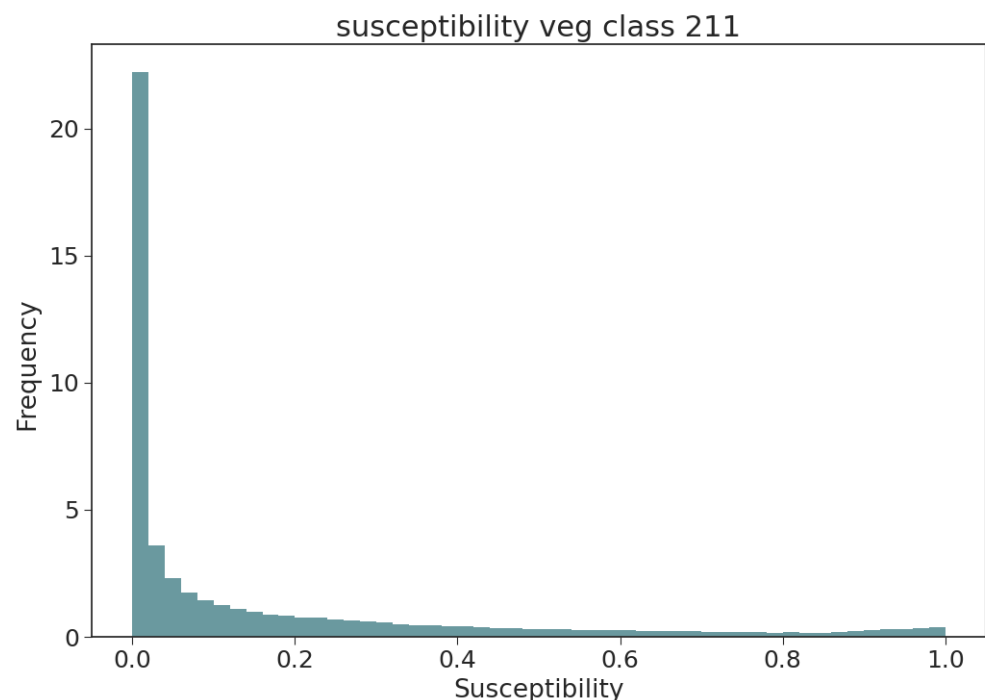

**Figure S6.** Normalized susceptibility distribution inside the non-irrigated arable land in the summer season (class 211).

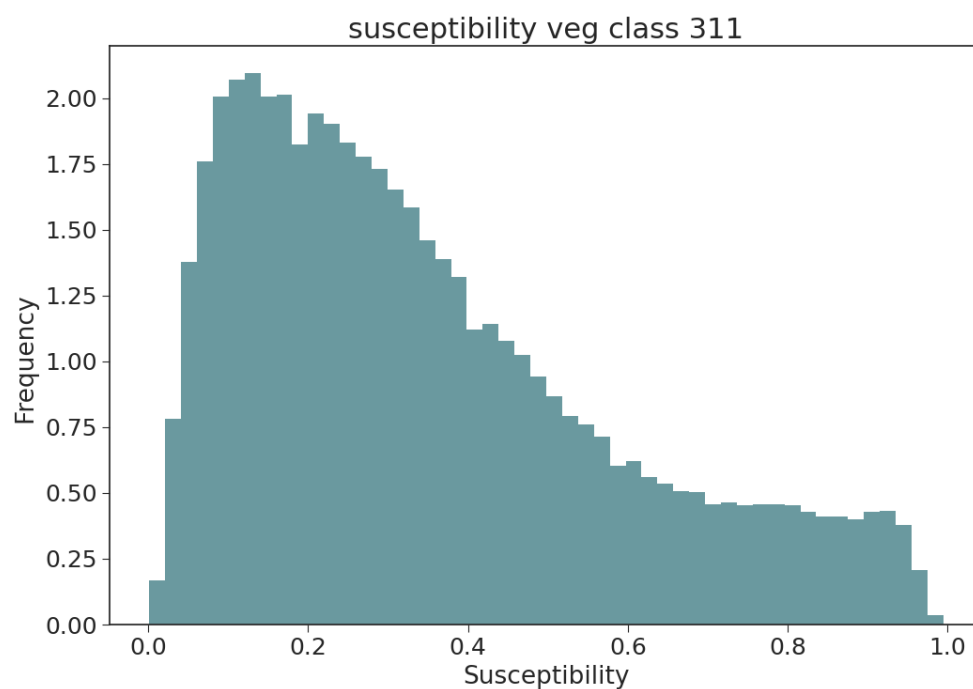

**Figure S7.** Normalized susceptibility distribution inside the broad leaved in the summer season (class 311).

#### 4. Wildfire susceptibility distribution for Montiferru and Marghine wildfires

In the Results section of the main manuscript, two large fires of 2021 which affected the western part of Sardinia, the Montiferru wildfire (July 2021), and the Marghine fire (August 2021) were presented, see Figure 19. In this Section, the distribution of the susceptibility values given by the summer seasonal map in the two burned areas is presented in detail. In Figure S14, the probability distribution of the pixel spanned by the two wildfires is represented, while Figure S15 portrays the subdivision of the affected pixels into different susceptibility classes.

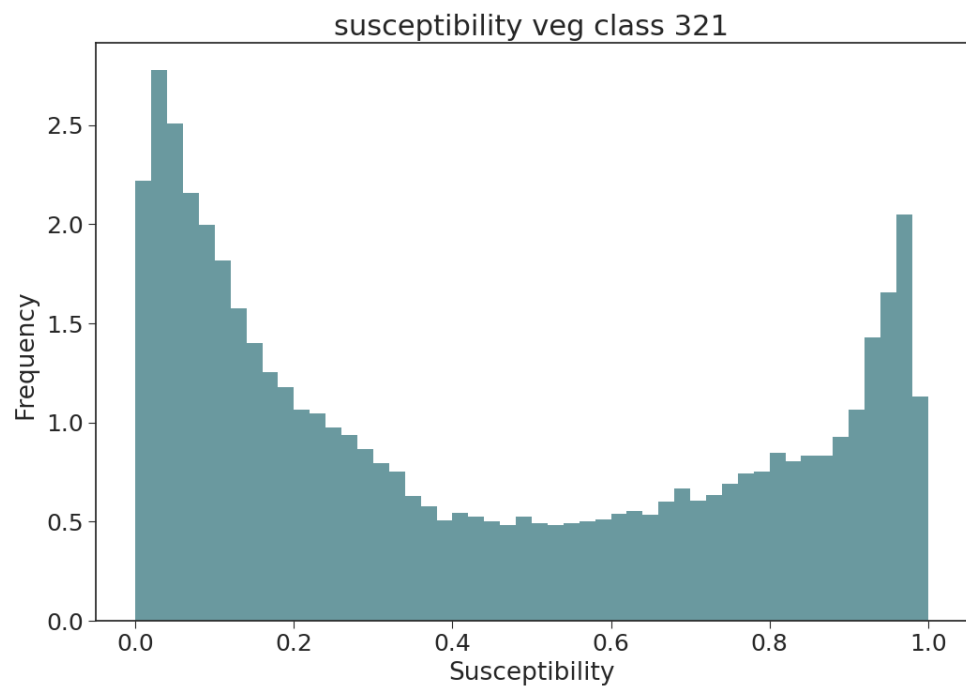

**Figure S8.** Normalized susceptibility distribution inside the natural grassland in the summer season (class 321).

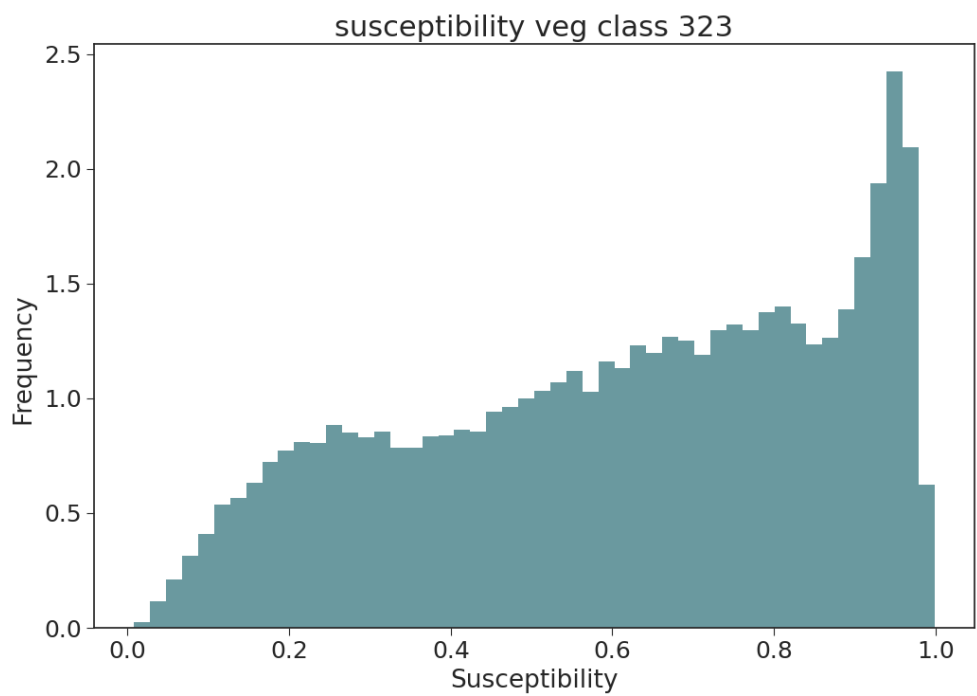

**Figure S9.** Normalized susceptibility distribution inside the Sclerophyllous vegetation in the summer season (class 323).

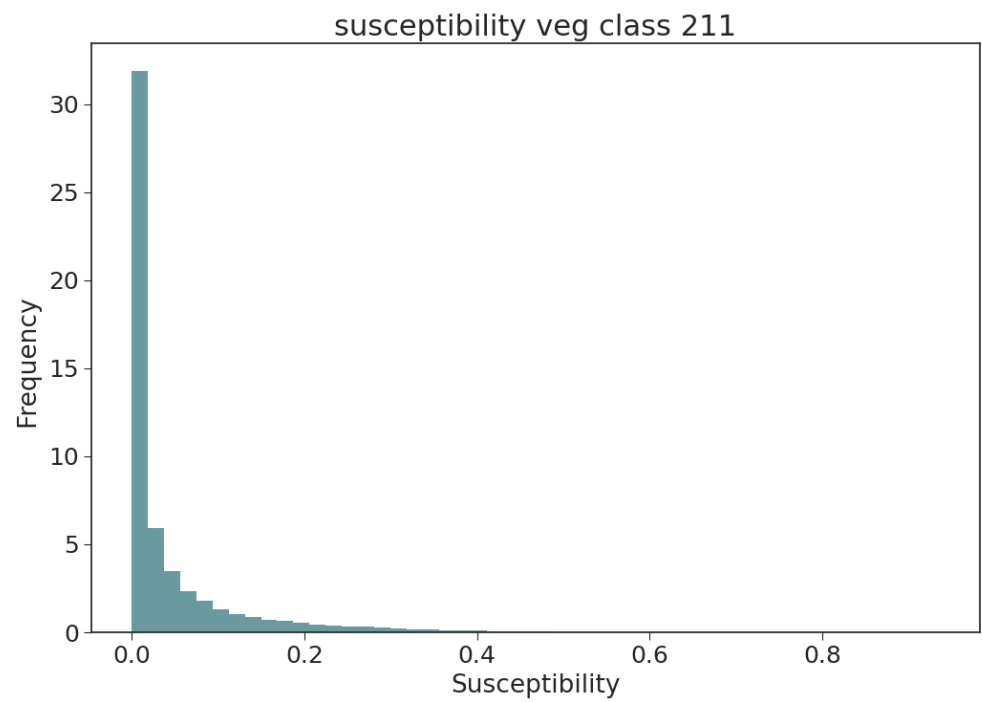

**Figure S10.** Normalized susceptibility distribution inside the non-irrigated arable land in the winter season (class 211)

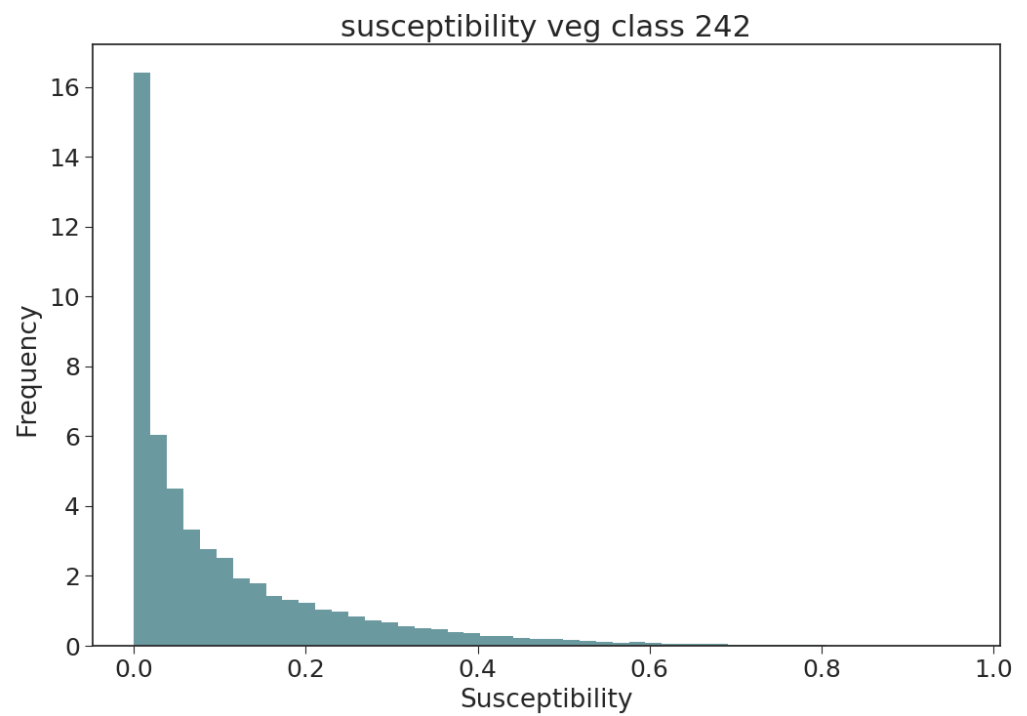

**Figure S11.** Normalized susceptibility distribution inside the rice fields in the winter season (class 242)



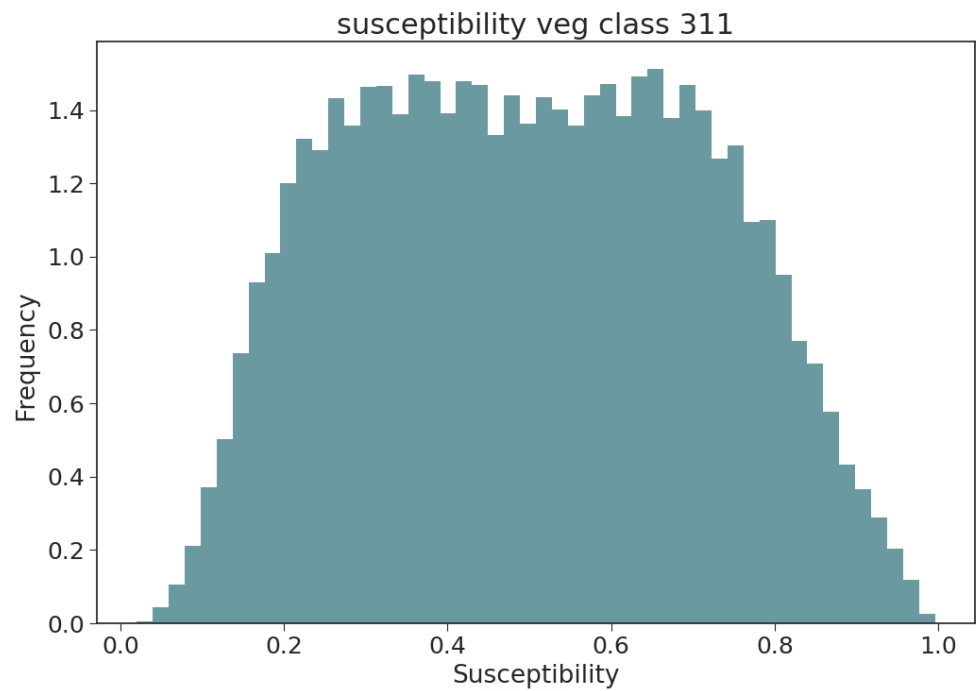

**Figure S12.** Normalized susceptibility distribution inside the broad leaved in the winter season (class 311)

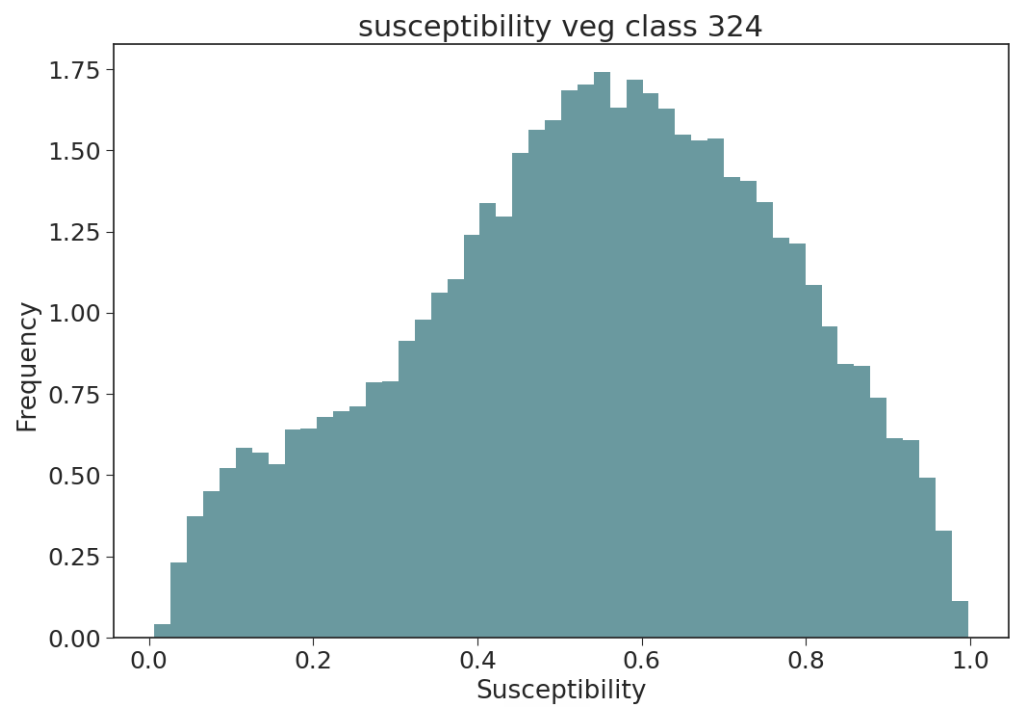

**Figure S13.** Normalized susceptibility distribution inside the Transitional woodland in the winter season (class 211)

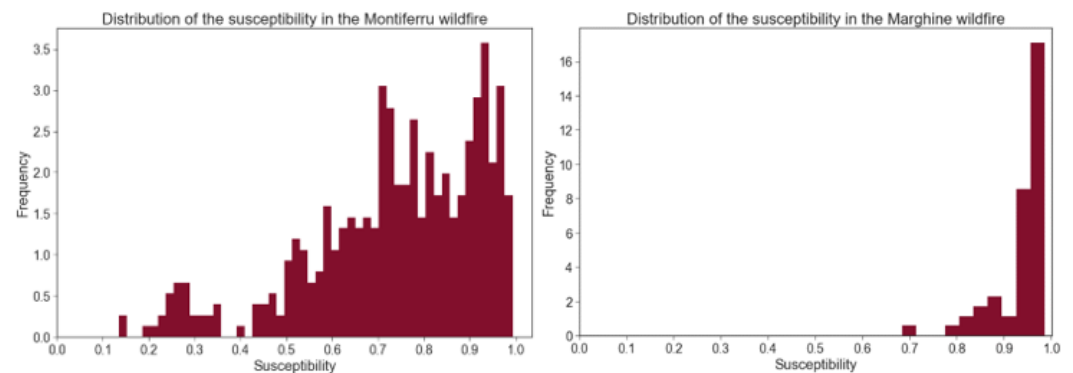

**Figure S14.** The two histograms refer to the susceptibility distribution in the 2 wildfires presented in Figure 19: the Montiferru wildfire on the left hand side, and the Marghine wildfire on the right hand side. The susceptibility map presents values over 0.5 in almost the totality of the pixel affected by the two wildfires, with a good of values over 0.7.

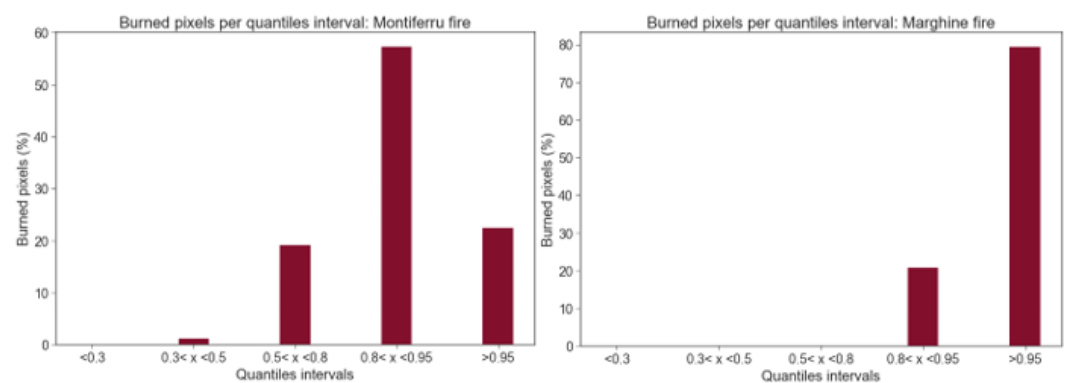

**Figure S15.** The two histograms refer to the susceptibility distribution in the two considered wildfires. The histogram on the left hand side refers to Montiferru wildfire, while the one on the right hand side to the Marghine wildfire. In both cases, most of the pixels fall on the two highest susceptibility classes.
